# Supplementary material for: Novel High Affinity Sigma-1 Receptor Ligands from Minimal Ensemble Docking-Based Virtual Screening
Source: MDPI journal article supplement (doi:10.3390/ijms22158112), 2021-07-29
Supplement: s1 [file s1]

---

**Supplementary information to:**

**Novel high affinity sigma-1 receptor ligands from a minimal ensemble docking-based virtual screening**

**Sz. Dvorácskó<sup>1</sup>, L. Lázár<sup>2</sup>, F. Fülöp<sup>2†</sup>, M. Palkó<sup>2</sup>, Z. Zalán<sup>2</sup>, B. Penke<sup>3</sup>, L. Fülöp<sup>3\*</sup>, Cs. Tömböly<sup>1</sup>, F. Bogár<sup>3,4\*</sup>**

<sup>1</sup> Institute of Biochemistry, Biological Research Centre, Eötvös Loránd Research Network (ELKH), H-6726 Szeged, Temesvári krt. 62, Hungary

<sup>2</sup> Institute of Pharmaceutical Chemistry, University of Szeged, H-6720 Szeged, Eötvös u. 6, Hungary

<sup>3</sup> Department of Medical Chemistry, University of Szeged, H-6720 Szeged, Dóm Square 8, Hungary

<sup>4</sup> MTA-SZTE Biomimetic Systems Research Group, Eötvös Loránd Research Network (ELKH), H-6720 Szeged, Dóm Square 8, Hungary

\* Correspondence: FB: bogar@sol.cc.u-szeged.hu; LF: fulop.livia@med.u-szeged.hu

FIGURES

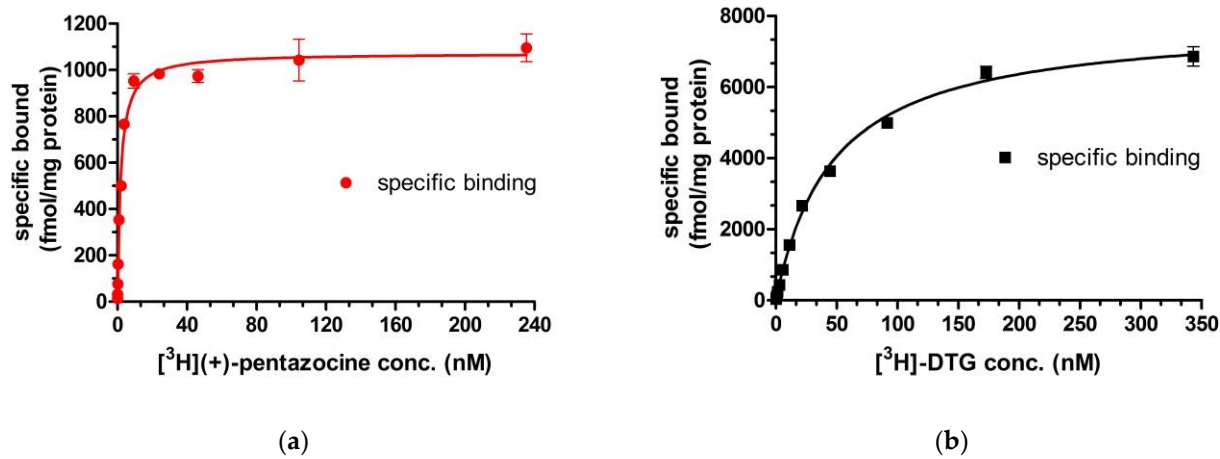

|                                     | [ <sup>3</sup> H]-(+)-pentazocine | [ <sup>3</sup> H]-DTG |
|-------------------------------------|-----------------------------------|-----------------------|
| K <sub>d</sub> ± S.E.M. (nM)        | 1.8 ± 0.17                        | 47 ± 2.1              |
| B <sub>max</sub> ± S.E.M. (fmol/mg) | 1072 ± 20                         | 7862 ± 140            |

(c)

**Figure S1.** Saturation isotherms of specific binding of (a) [<sup>3</sup>H]-(+)-pentazocine on guinea pig liver membrane homogenate, and (b) [<sup>3</sup>H]-DTG on rat liver membranes in the presence of 100 nM (+)-pentazocine. Nonspecific binding was determined in the presence of 10 μM haloperidol. Specific binding data are presented as means ± S.E.M of at least 3 independent experiments. (c) equilibrium binding data of [<sup>3</sup>H]-(+)-pentazocine and [<sup>3</sup>H]-DTG, i.e. dissociation equilibrium constant (K<sub>d</sub>) and receptor density (B<sub>max</sub>) values were calculated by fitting the saturation isotherms.

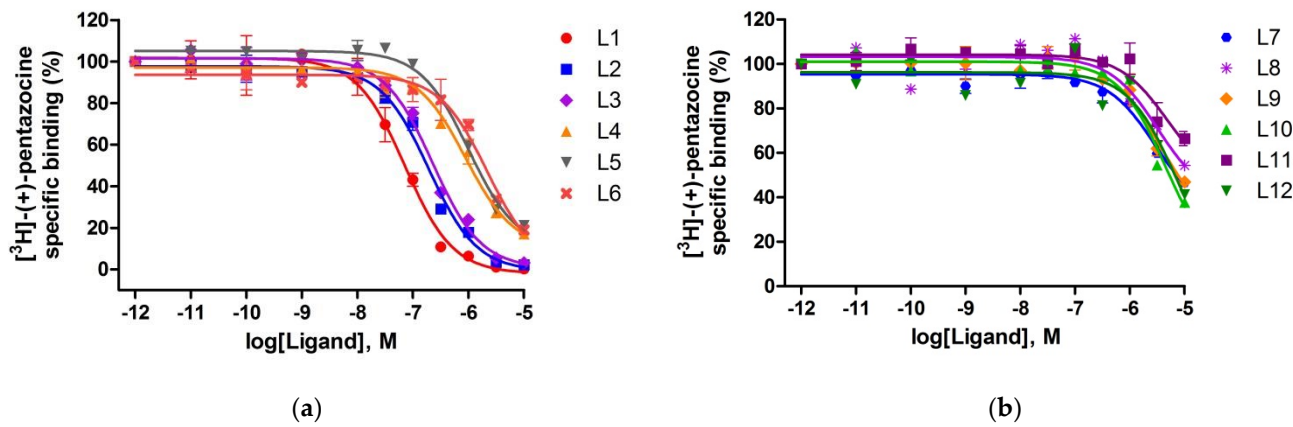

**Figure S2.** Competition of racemic ligands (a) L1-L6 and (b) L7-L12 with [<sup>3</sup>H]-(+)-pentazocine binding to S1R sites in guinea pig liver membranes.

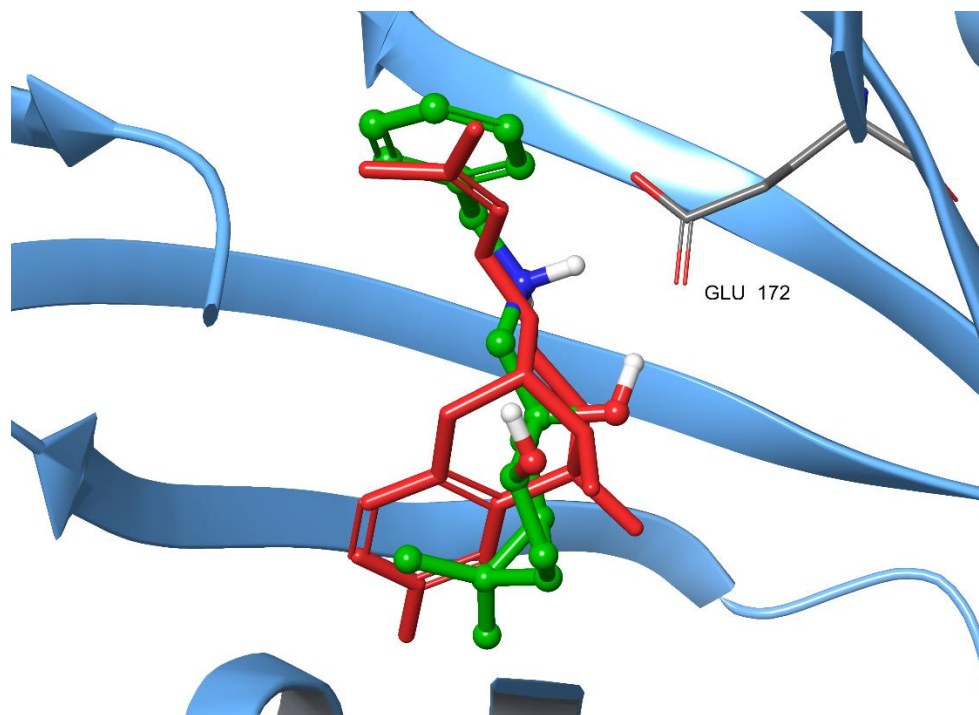

**Figure S3.** Binding pose of L7 (green carbons) and (+)-pentazocine (red) in the binding pocket of S1R (6DK1C, blue cartoon)

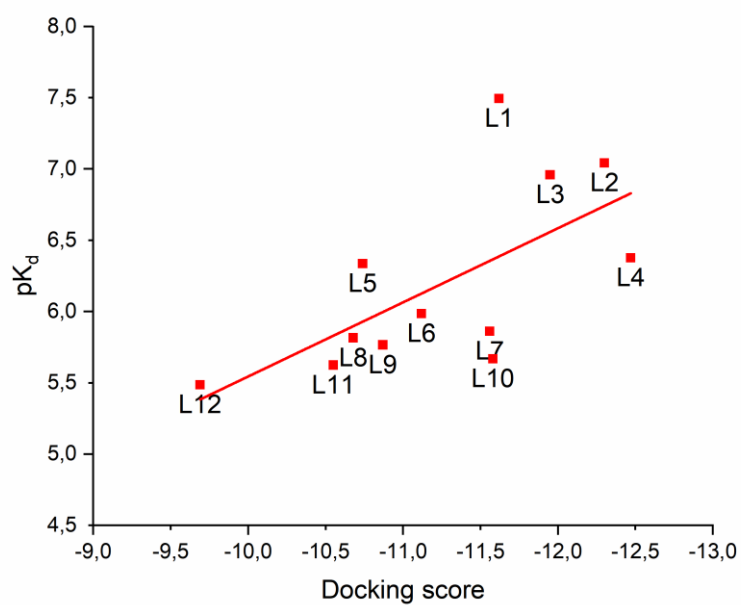

**Figure S4.** The correlation of experimental pK<sub>a</sub> values and the docking scores of the active ligands obtained from minimal ensemble virtual screening.

|                                                                                     |                                                                                     |                                                                                      |                                                                                       |
|-------------------------------------------------------------------------------------|-------------------------------------------------------------------------------------|--------------------------------------------------------------------------------------|---------------------------------------------------------------------------------------|
| 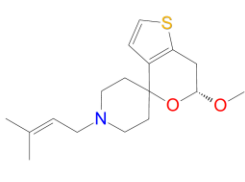   |    |    |    |
| A1-50321802                                                                         | A2-50041275                                                                         | A3-50321088                                                                          | A4-50001019                                                                           |
|    |    |    |    |
| A5-50063800                                                                         | A6-50299726                                                                         | A7-50034089                                                                          | A8-50435872                                                                           |
|    |    |    |    |
| A9-50005708                                                                         | A10-50058011                                                                        | A11-50181060                                                                         | A12-81924                                                                             |
|   |   |   |   |
| A13-50343619                                                                        | A14-50179280                                                                        | A15-50179262                                                                         | A16-50322240                                                                          |
|  |  |  |  |
| A17-312167                                                                          | A18-50206591                                                                        | A19-50204304                                                                         | A20-50047016                                                                          |

**Figure S5.** Diverse subset of twenty S1R ligands selected from the 190 compounds with  $K_i \leq 1 \text{ nM}$  collected from the BindingDB. After the ligand name (A-A20) the BindingDB ID is also shown.

|     | A1   | A2   | A3   | A4   | A5   | A6   | A7   | A8   | A9   | A10  | A11  | A12  | A13  | A14  | A15  | A16  | A17  | A18  | A19  | A20  |
|-----|------|------|------|------|------|------|------|------|------|------|------|------|------|------|------|------|------|------|------|------|
| A1  | 1,00 | 0,10 | 0,10 | 0,14 | 0,09 | 0,06 | 0,04 | 0,06 | 0,07 | 0,07 | 0,08 | 0,04 | 0,07 | 0,06 | 0,10 | 0,06 | 0,04 | 0,10 | 0,07 | 0,08 |
| A2  | 0,10 | 1,00 | 0,14 | 0,15 | 0,14 | 0,05 | 0,05 | 0,06 | 0,13 | 0,09 | 0,09 | 0,07 | 0,09 | 0,09 | 0,09 | 0,11 | 0,05 | 0,13 | 0,12 | 0,08 |
| A3  | 0,10 | 0,14 | 1,00 | 0,11 | 0,11 | 0,06 | 0,03 | 0,07 | 0,08 | 0,09 | 0,08 | 0,04 | 0,08 | 0,06 | 0,08 | 0,10 | 0,05 | 0,09 | 0,08 | 0,08 |
| A4  | 0,14 | 0,15 | 0,11 | 1,00 | 0,13 | 0,08 | 0,05 | 0,07 | 0,08 | 0,09 | 0,13 | 0,06 | 0,13 | 0,06 | 0,11 | 0,08 | 0,05 | 0,10 | 0,11 | 0,08 |
| A5  | 0,09 | 0,14 | 0,11 | 0,13 | 1,00 | 0,07 | 0,03 | 0,06 | 0,13 | 0,09 | 0,11 | 0,06 | 0,13 | 0,07 | 0,11 | 0,07 | 0,04 | 0,13 | 0,13 | 0,08 |
| A6  | 0,06 | 0,05 | 0,06 | 0,08 | 0,07 | 1,00 | 0,07 | 0,13 | 0,06 | 0,07 | 0,08 | 0,06 | 0,09 | 0,07 | 0,10 | 0,06 | 0,14 | 0,06 | 0,09 | 0,06 |
| A7  | 0,04 | 0,05 | 0,03 | 0,05 | 0,03 | 0,07 | 1,00 | 0,07 | 0,06 | 0,04 | 0,06 | 0,11 | 0,08 | 0,05 | 0,09 | 0,03 | 0,16 | 0,04 | 0,05 | 0,03 |
| A8  | 0,06 | 0,06 | 0,07 | 0,07 | 0,06 | 0,13 | 0,07 | 1,00 | 0,05 | 0,10 | 0,07 | 0,05 | 0,08 | 0,08 | 0,11 | 0,05 | 0,08 | 0,05 | 0,06 | 0,07 |
| A9  | 0,07 | 0,13 | 0,08 | 0,08 | 0,13 | 0,06 | 0,06 | 0,05 | 1,00 | 0,07 | 0,09 | 0,07 | 0,11 | 0,10 | 0,07 | 0,08 | 0,07 | 0,15 | 0,16 | 0,08 |
| A10 | 0,07 | 0,09 | 0,09 | 0,09 | 0,09 | 0,07 | 0,04 | 0,10 | 0,07 | 1,00 | 0,09 | 0,05 | 0,10 | 0,10 | 0,11 | 0,05 | 0,05 | 0,08 | 0,09 | 0,12 |
| A11 | 0,08 | 0,09 | 0,08 | 0,13 | 0,11 | 0,08 | 0,06 | 0,07 | 0,09 | 0,09 | 1,00 | 0,07 | 0,11 | 0,06 | 0,11 | 0,06 | 0,06 | 0,10 | 0,10 | 0,08 |
| A12 | 0,04 | 0,07 | 0,04 | 0,06 | 0,06 | 0,06 | 0,11 | 0,05 | 0,07 | 0,05 | 0,07 | 1,00 | 0,09 | 0,05 | 0,06 | 0,11 | 0,14 | 0,06 | 0,07 | 0,05 |
| A13 | 0,07 | 0,09 | 0,08 | 0,13 | 0,13 | 0,09 | 0,08 | 0,08 | 0,11 | 0,10 | 0,11 | 0,09 | 1,00 | 0,07 | 0,12 | 0,08 | 0,08 | 0,10 | 0,12 | 0,10 |
| A14 | 0,06 | 0,09 | 0,06 | 0,06 | 0,07 | 0,07 | 0,05 | 0,08 | 0,10 | 0,10 | 0,06 | 0,05 | 0,07 | 1,00 | 0,08 | 0,12 | 0,05 | 0,06 | 0,06 | 0,06 |
| A15 | 0,10 | 0,09 | 0,08 | 0,11 | 0,11 | 0,10 | 0,09 | 0,11 | 0,07 | 0,11 | 0,11 | 0,06 | 0,12 | 0,08 | 1,00 | 0,06 | 0,10 | 0,08 | 0,07 | 0,07 |
| A16 | 0,06 | 0,11 | 0,10 | 0,08 | 0,07 | 0,06 | 0,03 | 0,05 | 0,08 | 0,05 | 0,06 | 0,11 | 0,08 | 0,12 | 0,06 | 1,00 | 0,09 | 0,08 | 0,05 | 0,09 |
| A17 | 0,04 | 0,05 | 0,05 | 0,05 | 0,04 | 0,14 | 0,16 | 0,08 | 0,07 | 0,05 | 0,06 | 0,14 | 0,08 | 0,05 | 0,10 | 0,09 | 1,00 | 0,06 | 0,06 | 0,05 |
| A18 | 0,10 | 0,13 | 0,09 | 0,10 | 0,13 | 0,06 | 0,04 | 0,05 | 0,15 | 0,08 | 0,10 | 0,06 | 0,10 | 0,06 | 0,08 | 0,08 | 0,06 | 1,00 | 0,16 | 0,10 |
| A19 | 0,07 | 0,12 | 0,08 | 0,11 | 0,13 | 0,09 | 0,05 | 0,06 | 0,16 | 0,09 | 0,10 | 0,07 | 0,12 | 0,06 | 0,07 | 0,05 | 0,06 | 0,16 | 1,00 | 0,08 |
| A20 | 0,08 | 0,08 | 0,08 | 0,08 | 0,08 | 0,06 | 0,03 | 0,07 | 0,08 | 0,12 | 0,08 | 0,05 | 0,10 | 0,06 | 0,07 | 0,09 | 0,05 | 0,10 | 0,08 | 1,00 |

**Figure S6.** Similarity matrix of the active compounds (A1-A20) used in the enrichment studies. The highest cross-similarity is 0.16. Light yellow is used for similarity smaller than 0.1, and dark yellow for the values between 0.1 and 0.16.
